# Supplementary material for: Nurse Staffing Under Absenteeism: A Distributionally Robust Optimization Approach
Source: Atypon-hosted journal article supplement (doi:10.1287/msom.2023.0398), 2025-01-09
Supplement: msom.2023.0398.sm1.pdf [file msom.2023.0398.sm1.pdf]

598 **Nurse Staffing under Absenteeism: A Distributionally Robust Optimization**  
 599 **Approach**

600 *Minseok Ryu and Ruiwei Jiang*

601

602 **Appendix A: Proof of Lemma 1**

603 *Proof:* We rewrite formulation (1a)–(1c) as

$$\begin{aligned}
 V(\tilde{w}, \tilde{y}, \tilde{d}) = & \min_{z \in \mathbb{Z}_+^{I \times |P_i|}, x \in \mathbb{Z}_+^J} \sum_{j=1}^J c_j^x x_j \\
 \text{s.t. } & x_j + \sum_{i \in [I]: j \in P_i} z_{ij} \geq \tilde{d}_j - \tilde{w}_j, \quad \forall j \in [J], \quad - \sum_{j \in P_i} z_{ij} \geq -\tilde{y}_i, \quad \forall i \in [I], \quad (18a)
 \end{aligned}$$

604 We note that the constraint matrix of the above formulation is totally unimodular (TU), and so the conclusion  
 605 follows. To see the TU property, we consider the following constraint matrix:

$$\begin{bmatrix} x_j + \sum_{i \in [I]: j \in P_i} z_{ij} \\ - \sum_{j \in P_i} z_{ij} \end{bmatrix}.$$

606 It follows that (a) each entry of this matrix is  $-1, 0,$  or  $1,$  (b) this matrix has at most two nonzero entries in  
 607 each column, and (c) the entries sum up to be zero for any column containing two nonzero entries. Hence,  
 608 the constraint matrix is TU based on Proposition 2.6 in [Nemhauser and Wolsey \(1999\)](#). The conclusion  
 609 follows because  $\tilde{d}_j - \tilde{w}_j$  and  $-\tilde{y}_i$  are integers for all  $j \in [J]$  and for all  $i \in [I]$ , respectively.  $\square$

610

611 **Appendix B: Verifying Assumption 1**

612 We present necessary and sufficient conditions for Assumption 1 in the following proposition.

613 **PROPOSITION 7.** *For any given  $w$  and  $y$ ,  $\mathcal{D}(w, y)$  is non-empty if and only if the following three conditions*  
 614 *are satisfied:*

- 615 1.  $f_j(w_j) \in [0, w_j]$  for all  $j \in [J]$ ;
- 616 2.  $g_i(y_i) \in [0, y_i]$  for all  $i \in [I]$ ;
- 617 3. The following polyhedron defined for every  $j \in [J]$  is nonempty:

$$\left\{ p_j \in \mathbb{R}_+^{d_j^U - d_j^L + 1} : \sum_{k=d_j^L}^{d_j^U} k^q p_{jk} = \mu_{jq}, \quad \forall q \in [Q], \quad \sum_{k=d_j^L}^{d_j^U} p_{jk} = 1 \right\}. \quad (19)$$

618

619 *Proof: (Necessity)* Suppose that  $\mathcal{D}(w, y) \neq \emptyset$ . Then, there exists a  $\mathbb{P} \in \mathcal{P}(\Xi)$  such that  $\mathbb{E}_{\mathbb{P}}[\tilde{d}_j^q] = \mu_{jq}$  for all  
 620  $j \in [J]$  and  $q \in [Q]$ ,  $\mathbb{E}_{\mathbb{P}}[\tilde{w}_j] = f_j(w_j)$  for all  $j \in [J]$ , and  $\mathbb{E}_{\mathbb{P}}[\tilde{y}_i] = g_i(y_i)$  for all  $i \in [I]$ . It follows that, for  
 621 all  $j \in [J]$ , we have  $f_j(w_j) \leq \text{esssup}_{\Xi} \{\tilde{w}_j\} \leq w_j$  and  $f_j(w_j) \geq \text{essinf}_{\Xi} \{\tilde{w}_j\} \geq 0$ , leading to  $f_j(w_j) \in [0, w_j]$ .  
 622 Likewise, it holds that  $g_i(y_i) \in [0, y_i]$  for all  $i \in [I]$ . In addition, for all  $j \in [J]$  and  $k \in [d_j^L, d_j^U]_{\mathbb{Z}}$ , we let  
 623  $\bar{p}_{jk} = \mathbb{P}\{\tilde{d}_j = k\}$ . It follows that, for all  $q \in [Q]$ ,  $\sum_{k=d_j^L}^{d_j^U} k^q \bar{p}_{jk} = \sum_{k=d_j^L}^{d_j^U} \mathbb{P}\{\tilde{d}_j = k\} = 1$ . Moreover,

$$\sum_{k=d_j^L}^{d_j^U} k^q \bar{p}_{jk} = \sum_{k=d_j^L}^{d_j^U} k^q \mathbb{P}\{\tilde{d}_j = k\} = \mathbb{E}_{\mathbb{P}}[\tilde{d}_j^q] = \mu_{jq}.$$

624 Hence,  $\bar{p}_{jk}$  constitutes a feasible solution to the polyhedron (19). This holds for all  $j \in [J]$  and proves the  
625 necessity of the three conditions.

626 **(Sufficiency)** Suppose that the three conditions are satisfied. For all  $j \in [J]$ , as  $f_j(w_j) \in [0, w_j] \equiv$   
627  $\text{conv}([0, w_j]_{\mathbb{Z}})$  by condition 1, there exists a  $\mathbb{P}_{\tilde{w}_j} \in \mathcal{P}([0, w_j]_{\mathbb{Z}})$  such that  $f_j(w_j) = \mathbb{E}_{\mathbb{P}_{\tilde{w}_j}}[\tilde{w}_j]$ . Likewise, for all  
628  $i \in [I]$ , there exists a  $\mathbb{P}_{\tilde{y}_i} \in \mathcal{P}([0, y_i]_{\mathbb{Z}})$  such that  $g_i(y_i) = \mathbb{E}_{\mathbb{P}_{\tilde{y}_i}}[\tilde{y}_i]$ . In addition, for all  $j \in [J]$ , there exist  
629  $p_{jk}$  such that  $\sum_{k=d_j^L}^{d_j^U} k^q p_{jk} = \mu_{jq}$  for all  $q \in [Q]$  and  $\sum_{k=d_j^L}^{d_j^U} p_{jk} = 1$ . Defining  $\mathbb{P}_{\tilde{d}_j} \in \mathcal{P}([d_j^L, d_j^U]_{\mathbb{Z}})$  such that  
630  $\mathbb{P}_{\tilde{d}_j}\{\tilde{d}_j = k\} = p_{jk}$  for all  $k \in [d_j^L, d_j^U]_{\mathbb{Z}}$ , we have  $\mathbb{E}_{\mathbb{P}_{\tilde{d}_j}}[\tilde{d}_j^q] = \mu_{jq}$ .

Therefore, the probability distribution

$$\mathbb{P} := \prod_{j=1}^J \mathbb{P}_{\tilde{w}_j} \times \prod_{i=1}^I \mathbb{P}_{\tilde{y}_i} \times \prod_{j=1}^J \mathbb{P}_{\tilde{d}_j}$$

631 satisfies (2a)–(2b) and hence  $\mathbb{P} \in \mathcal{D}(w, y)$ . It follows that  $\mathcal{D}(w, y) \neq \emptyset$  and the proof is completed.  $\square$

### 632 Appendix C: Proof of Proposition 1

634 *Proof:* First, denoting  $\tilde{\xi} := (\tilde{w}, \tilde{y}, \tilde{d})$ , we present  $\max_{\mathbb{P} \in \mathcal{D}(w, y)} \mathbb{E}_{\mathbb{P}}[V(\tilde{w}, \tilde{y}, \tilde{d})]$  as the following optimization prob-  
635 lem:

$$\max_{p \geq 0} \sum_{\tilde{\xi} \in \Xi} p_{\tilde{\xi}} V(\tilde{\xi})$$

$$\text{s.t.} \quad \sum_{\tilde{\xi} \in \Xi} p_{\tilde{\xi}} \tilde{w}_j = f_j(w_j), \quad \forall j \in [J], \quad (20a)$$

$$\sum_{\tilde{\xi} \in \Xi} p_{\tilde{\xi}} \tilde{y}_i = g_i(y_i), \quad \forall i \in [I], \quad (20b)$$

$$\sum_{\tilde{\xi} \in \Xi} p_{\tilde{\xi}} \tilde{d}_j^q = \mu_{jq}, \quad \forall j \in [J], \quad \forall q \in [Q], \quad (20c)$$

$$\sum_{\tilde{\xi} \in \Xi} p_{\tilde{\xi}} = 1, \quad (20d)$$

636 where decision variables  $p_{\tilde{\xi}}$  represent the probability of the random variables being realized as  $\tilde{\xi}$ , and con-  
637 straints (20a)–(20d) describe the ambiguity set  $\mathcal{D}(w, y)$  defined in (2a)–(2b). The dual of this formulation is

$$\min_{\gamma, \lambda, \rho, \theta} \sum_{j=1}^J \sum_{q=1}^Q \mu_{jq} \rho_{jq} + \sum_{j=1}^J f_j(w_j) \gamma_j + \sum_{i=1}^I g_i(y_i) \lambda_i + \theta \quad (21a)$$

$$\text{s.t.} \quad \theta + \sum_{j=1}^J \sum_{q=1}^Q \rho_{jq} \tilde{d}_j^q + \sum_{j=1}^J \gamma_j \tilde{w}_j + \sum_{i=1}^I \lambda_i \tilde{y}_i \geq V(\tilde{\xi}), \quad \forall \tilde{\xi} \in \Xi, \quad (21b)$$

639 where dual variables  $\gamma_j$ ,  $\lambda_i$ ,  $\rho_{jq}$ , and  $\theta$  are associated with primal constraints (20a)–(20d), respectively,

640 and dual constraints (21b) are associated with primal variables  $p_{\tilde{\xi}}$ . By Assumption 1, strong duality holds

641 between the primal and dual formulations because they are both linear programs. As the objective function

642 aims to minimize the value of  $\theta$ , we observe by constraints (21b) that  $\theta = \max_{\tilde{\xi} \in \Xi} \{V(\tilde{\xi}) - \sum_{j=1}^J \sum_{q=1}^Q \rho_{jq} \tilde{d}_j^q -$

643  $\sum_{j=1}^J \gamma_j \tilde{w}_j - \sum_{i=1}^I \lambda_i \tilde{y}_i\}$ . Hence,  $\max_{\mathbb{P} \in \mathcal{D}(w, y)} \mathbb{E}_{\mathbb{P}}[V(\tilde{\xi})]$  equals the optimal value of the following min-max

644 optimization problem:

$$\min_{\gamma, \lambda, \rho} \max_{\tilde{\xi} \in \Xi} \left\{ V(\tilde{\xi}) - \sum_{j=1}^J \left[ \sum_{q=1}^Q \rho_{jq} \tilde{d}_j^q + \gamma_j \tilde{w}_j \right] - \sum_{i=1}^I \lambda_i \tilde{y}_i \right\} + \sum_{j=1}^J \left[ \sum_{q=1}^Q \mu_{jq} \rho_{jq} + f_j(w_j) \gamma_j \right] + \sum_{i=1}^I g_i(y_i) \lambda_i. \quad (22a)$$

645 Second, in view of the dual formulation (4a)–(4c) of  $V(\tilde{\xi})$ , we rewrite the maximum term in (22a) as

$$\begin{aligned} & \max_{(\tilde{w}, \tilde{y}, \tilde{d}) \in \Xi} \max_{(\alpha, \beta) \in \Lambda} \left\{ \sum_{j=1}^J (\tilde{d}_j - \tilde{w}_j) \alpha_j + \sum_{i=1}^I \tilde{y}_i \beta_i - \sum_{j=1}^J \left[ \sum_{q=1}^Q \rho_{jq} \tilde{d}_j^q + \gamma_j \tilde{w}_j \right] - \sum_{i=1}^I \lambda_i \tilde{y}_i \right\} \\ &= \max_{(\alpha, \beta) \in \Lambda} \max_{(\tilde{w}, \tilde{y}, \tilde{d}) \in \Xi} \left\{ \sum_{j=1}^J (\tilde{d}_j - \tilde{w}_j) \alpha_j + \sum_{i=1}^I \tilde{y}_i \beta_i - \sum_{j=1}^J \left[ \sum_{q=1}^Q \rho_{jq} \tilde{d}_j^q + \gamma_j \tilde{w}_j \right] - \sum_{i=1}^I \lambda_i \tilde{y}_i \right\} \\ &= \max_{(\alpha, \beta) \in \Lambda} \left\{ \sum_{j=1}^J \max_{\tilde{w}_j \in [0, w_j]_{\mathbb{Z}}} \left\{ (-\alpha_j - \gamma_j) \tilde{w}_j \right\} + \sum_{i=1}^I \max_{\tilde{y}_i \in [0, y_i]_{\mathbb{Z}}} \left\{ (\beta_i - \lambda_i) \tilde{y}_i \right\} + \sum_{j=1}^J \max_{\tilde{d}_j \in [\tilde{d}_j^L, \tilde{d}_j^U]_{\mathbb{Z}}} \left\{ \alpha_j \tilde{d}_j - \sum_{q=1}^Q \rho_{jq} \tilde{d}_j^q \right\} \right\}. \end{aligned}$$

646 Finally, as  $(-\alpha_j - \gamma_j) \tilde{w}_j$  is linear in  $\tilde{w}_j$ , we have

$$\max_{\tilde{w}_j \in [0, w_j]_{\mathbb{Z}}} \left\{ (-\alpha_j - \gamma_j) \tilde{w}_j \right\} = \max \left\{ 0, (-\alpha_j - \gamma_j) w_j \right\} = \left[ (-\alpha_j - \gamma_j) w_j \right]_+.$$

647 Similarly, we have  $\max_{\tilde{y}_i \in [0, y_i]_{\mathbb{Z}}} \left\{ (\beta_i - \lambda_i) \tilde{y}_i \right\} = \left[ (\beta_i - \lambda_i) y_i \right]_+$ . This completes the proof.  $\square$

## 648 Appendix D: Proof of Lemma 2

649 *Proof:* As  $\max_{(\alpha, \beta) \in \Lambda} F(\alpha, \beta)$  is to maximize a convex function over a polyhedron, we only need to analyze  
650 the extreme directions and extreme points of  $\Lambda$ .

651 First, the extreme directions of  $\Lambda$  are  $(\alpha, \beta) = (0, -e_i)$  for all  $i \in [I]$ , where  $e_i$  represents the  $i^{\text{th}}$  standard  
652 basis vector. As  $\tilde{y}_i \geq 0$ , moving along any of these extreme directions (i.e., decreasing the value of any  
653  $\beta_i$ ) does not increase the value of  $F(\alpha, \beta)$ . Hence, we can omit these extreme directions in the attempt of  
654 maximizing  $F(\alpha, \beta)$  and accordingly  $\bar{\beta}_i = \min\{-\bar{\alpha}_j : j \in P_i\} = -\max\{\bar{\alpha}_j : j \in P_i\}$  without loss of optimality.  
655 This proves property (b) in the claim. In addition, there exists an extreme point of  $\Lambda$  that is optimal to  
656  $\max_{(\alpha, \beta) \in \Lambda} F(\alpha, \beta)$ .

657 Second, we prove, by contradiction, that each extreme point of  $\Lambda$  satisfies property (a) in the claim.  
658 Suppose that there exists an extreme point  $(\bar{\alpha}, \bar{\beta})$  such that property (a) fails, i.e.,  $\bar{\alpha}_{j^*} \notin \{0, c_1^x, \dots, c_{j^*}^x\}$  for  
659 some  $j^* \in [J]$ . Consider the set  $\mathcal{I}(j^*) := \{i \in [I] : -\bar{\beta}_i = \bar{\alpha}_{j^*}\}$ . We discuss the following two cases. In each case,  
660 we shall construct two points in  $\Lambda$  such that their midpoint is  $(\bar{\alpha}, \bar{\beta})$ , which provides a desired contradiction.  
661 1. If  $\mathcal{I}(j^*) = \emptyset$ , then  $-\bar{\beta}_i > \bar{\alpha}_{j^*}$  for all  $i$  such that  $j^* \in P_i$ . Defining  $\epsilon := (1/2) \min \left\{ -\bar{\beta}_i - \bar{\alpha}_{j^*}, \forall i \in [I] : \right.$   
662  $\left. j^* \in P_i, \bar{\alpha}_{j^*}, \min \{ |\bar{\alpha}_{j^*} - c_\ell^x| : \ell \in [j^*] \} \right\} > 0$ , we construct two points  $(\bar{\alpha}^+, \bar{\beta})$  and  $(\bar{\alpha}^-, \bar{\beta})$  such that  
663  $\bar{\alpha}_{j^*}^+ = \bar{\alpha}_{j^*} + \epsilon$ ,  $\bar{\alpha}_{j^*}^- = \bar{\alpha}_{j^*} - \epsilon$ , and  $\bar{\alpha}_j^+ = \bar{\alpha}_j^- = \bar{\alpha}_j$  for all  $j \neq j^*$ . Then, it is clear that  $(\bar{\alpha}^+, \bar{\beta}), (\bar{\alpha}^-, \bar{\beta}) \in \Lambda$ .  
664 But  $(\bar{\alpha}, \bar{\beta}) = (1/2)(\bar{\alpha}^+, \bar{\beta}) + (1/2)(\bar{\alpha}^-, \bar{\beta})$ , which contradicts the fact that  $(\bar{\alpha}, \bar{\beta})$  is an extreme point of  $\Lambda$ .  
665 2. If  $\mathcal{I}(j^*) \neq \emptyset$ , then we define  $\mathcal{J}(j^*) := \bigcup_{i \in \mathcal{I}(j^*)} \{j \in P_i : \bar{\alpha}_j = -\bar{\beta}_i\}$ . It follows that  $\bar{\alpha}_j = \bar{\alpha}_{j^*}$  for all  $j \in$   
666  $\mathcal{J}(j^*)$ . Hence, for each  $i \in \mathcal{I}(j^*)$ ,  $\bar{\alpha}_j = \bar{\alpha}_{j^*}$  for all  $j \in P_i \cap \mathcal{J}(j^*)$  and  $\bar{\alpha}_j < \bar{\alpha}_{j^*}$  for all  $j \in P_i \setminus \mathcal{J}(j^*)$ .  
667 We define  $\epsilon := (1/2) \min \left\{ \min \{ \bar{\alpha}_{j^*} - \bar{\alpha}_j : i \in \mathcal{I}(j^*), j \in P_i \setminus \mathcal{J}(j^*) \}, \min \{ -\bar{\beta}_i - \bar{\alpha}_{j^*} : i \notin \mathcal{I}(j^*), -\bar{\beta}_i > \right.$   
668  $\left. \bar{\alpha}_{j^*} \}, \bar{\alpha}_{j^*}, \min \{ |\bar{\alpha}_{j^*} - c_\ell^x| : \ell \in [j^*] \} \right\}$ . Then  $\epsilon > 0$  because it is the minimum of a finite number of positive  
669 reals. Here we adopt the convention that  $\min\{a : a \in A\} = \infty$  if  $A = \emptyset$ . For example, if there does not  
670 exist an  $i \notin \mathcal{I}(j^*)$  such that  $-\bar{\beta}_i > \bar{\alpha}_{j^*}$ , then  $\min\{-\bar{\beta}_i - \bar{\alpha}_{j^*} : i \notin \mathcal{I}(j^*), -\bar{\beta}_i > \bar{\alpha}_{j^*}\} = \infty$ . We construct two  
671 points  $(\bar{\alpha}^+, \bar{\beta}^+)$  and  $(\bar{\alpha}^-, \bar{\beta}^-)$  such that  
672

$$\bar{\alpha}_j^+ = \begin{cases} \bar{\alpha}_{j^*} + \epsilon & \forall j \in \mathcal{J}(j^*) \\ \bar{\alpha}_j & \text{otherwise} \end{cases}, \quad \bar{\alpha}_j^- = \begin{cases} \bar{\alpha}_{j^*} - \epsilon & \forall j \in \mathcal{J}(j^*) \\ \bar{\alpha}_j & \text{otherwise} \end{cases},$$

$$\bar{\beta}_i^+ = \begin{cases} -(\bar{\alpha}_{j^*} + \epsilon) & \forall i \in \mathcal{I}(j^*) \\ \bar{\beta}_i & \text{otherwise} \end{cases}, \quad \bar{\beta}_i^- = \begin{cases} -(\bar{\alpha}_{j^*} - \epsilon) & \forall i \in \mathcal{I}(j^*) \\ \bar{\beta}_i & \text{otherwise} \end{cases}.$$

673 It is clear that  $(\bar{\alpha}, \bar{\beta}) = (1/2)(\bar{\alpha}^+, \bar{\beta}^+) + (1/2)(\bar{\alpha}^-, \bar{\beta}^-)$ . To finish the proof, it remains to show that  
 674  $(\bar{\alpha}^+, \bar{\beta}^+), (\bar{\alpha}^-, \bar{\beta}^-) \in \Lambda$ . To see this, we check constraints (4b) and (4c). For constraints (4c), we have  
 675  $\bar{\alpha}_j^+, \bar{\alpha}_j^- \in (0, c_j^x)$  for all  $j \in \mathcal{J}(j^*)$  by the definition of  $\epsilon$ . Additionally, for all  $j \notin \mathcal{J}(j^*)$ , we have  $\bar{\alpha}_j^+ =$   
 676  $\bar{\alpha}_j^- = \bar{\alpha}_j \in [0, c_j^x]$ . Hence, constraints (4c) are indeed satisfied and it remains to check constraints (4b).  
 677 For each  $i \in \mathcal{I}(j^*)$ ,  $-\bar{\beta}_i^+ = \bar{\alpha}_{j^*} + \epsilon = \bar{\alpha}_j^+$  for all  $j \in P_i \cap \mathcal{J}(j^*)$  and  $-\bar{\beta}_i^+ = \bar{\alpha}_{j^*} + \epsilon \geq \bar{\alpha}_j \geq \bar{\alpha}_j^+$  for  
 678 all  $j \in P_i \setminus \mathcal{J}(j^*)$ , where the first inequality is because  $\epsilon > 0$ , and the second inequality follows from the  
 679 definition of  $\mathcal{J}(j^*)$ . Meanwhile,  $-\bar{\beta}_i^- = \bar{\alpha}_{j^*} - \epsilon = \bar{\alpha}_j^-$  for all  $j \in P_i \cap \mathcal{J}(j^*)$ , and  $-\bar{\beta}_i^- = \bar{\alpha}_{j^*} - \epsilon \geq \bar{\alpha}_j = \bar{\alpha}_j^-$   
 680 for all  $j \in P_i \setminus \mathcal{J}(j^*)$ , where the inequality follows from the definition of  $\epsilon$  and the last equality is because  
 681  $j \notin \mathcal{J}(j^*)$ . It follows that constraints (4b) are indeed satisfied for all  $i \in \mathcal{I}(j^*)$ . For each  $i \notin \mathcal{I}(j^*)$ ,  $\bar{\beta}_i^+ =$   
 682  $\bar{\beta}_i^- = \bar{\beta}_i$  and  $-\bar{\beta}_i \neq \bar{\alpha}_{j^*}$ . We discuss the following two sub-cases to complete the proof.

- 683 (a) If  $-\bar{\beta}_i > \bar{\alpha}_{j^*}$ , then  $-\bar{\beta}_i^+ = -\bar{\beta}_i \geq \bar{\alpha}_{j^*} + \epsilon \geq \bar{\alpha}_j^+$ , where the first inequality follows from the definition of  
 684  $\epsilon$ . In addition, by construction  $-\bar{\beta}_i^- = -\bar{\beta}_i > \bar{\alpha}_{j^*} \geq \bar{\alpha}_j^-$  for all  $j \in P_i$ .  
 685 (b) If  $-\bar{\beta}_i < \bar{\alpha}_{j^*}$ , then  $j \notin \mathcal{J}(j^*)$  for all  $j \in P_i$  because otherwise  $-\bar{\beta}_i \geq \bar{\alpha}_j = \bar{\alpha}_{j^*}$ . It follows that  
 686  $\bar{\alpha}_j^+ = \bar{\alpha}_j^- = \bar{\alpha}_j$  and so  $-\bar{\beta}_i^+ = -\bar{\beta}_i \geq \bar{\alpha}_j = \bar{\alpha}_j^+$  and  $-\bar{\beta}_i^- = -\bar{\beta}_i \geq \bar{\alpha}_j = \bar{\alpha}_j^-$ .  $\square$

687  
688

## Appendix E: Proof of Theorem 1

689 *Proof:* First, pick any  $(\alpha, \beta) \in \Lambda$  that satisfies the optimality conditions (a)–(b) stated in Lemma 2. We shall  
 690 show that there exists a feasible solution  $(t, s, r, p)$  to formulation (7) that attains the same objective function  
 691 value as  $F(\alpha, \beta)$ .

692 To this end, for all  $j \in [J]$  and  $k \in [j]$ , we let  $t_{jk} = 1$  if  $\alpha_j = c_k^x$ , and  $t_{jk} = 0$  otherwise. In addition, for all  
 693  $i \in [I]$ , if  $\alpha_j = 0$  for all  $j \in P_i$ , then we let  $s_{ik} = 0$  for all  $k \in [J(i)]$ ; and otherwise, i.e. there exists a  $k^* \in [J(i)]$   
 694 such that  $\max\{\alpha_j : j \in P_i\} = c_{k^*}^x$ , we let  $s_{ik^*} = 1$  and all other  $s_{ik} = 0$ . Also, we define  $r$  and  $p$  as in (7b). By  
 695 construction,  $(t, s, r, p)$  satisfies (7b). It follows that the objective function value of  $(t, s, r, p)$  equals

$$\begin{aligned} & \sum_{j=1}^J \left( c_j^r r_j + \sum_{k=1}^j c_{jk}^t t_{jk} \right) + \sum_{i=1}^I \left( c_i^p p_i + \sum_{k=1}^{J(i)} c_{ik}^s s_{ik} \right) \\ &= \sum_{j=1}^J \left[ \mathbb{1}_{\{0\}}(\alpha_j) \left\{ [-\gamma_j w_j]_+ + \max_{\tilde{d}_j \in [d_j^L, d_j^U]_{\mathbb{Z}}} \left\{ -\sum_{q=1}^Q \rho_{jq} \tilde{d}_j^q \right\} \right\} + \right. \\ & \quad \left. \sum_{k=1}^j \mathbb{1}_{\{c_k^x\}}(\alpha_j) \left\{ [(-c_k^x - \gamma_j) w_j]_+ + \max_{\tilde{d}_j \in [d_j^L, d_j^U]_{\mathbb{Z}}} \left\{ c_k^x \tilde{d}_j - \sum_{q=1}^Q \rho_{jq} \tilde{d}_j^q \right\} \right\} \right] + \\ & \quad \sum_{i=1}^I \left[ \left\{ \mathbb{1}_{\{0\}} \left( \max_{j \in P_i} \{\alpha_j\} \right) [-\lambda_i y_i]_+ \right\} + \sum_{k=1}^{J(i)} \left\{ \mathbb{1}_{\{c_k^x\}} \left( \max_{j \in P_i} \{\alpha_j\} \right) [(-c_k^x - \lambda_i) y_i]_+ \right\} \right] \\ &= \sum_{j=1}^J \left[ \left\{ [(-\alpha_j - \gamma_j) w_j]_+ + \max_{\tilde{d}_j \in [d_j^L, d_j^U]_{\mathbb{Z}}} \left\{ \alpha_j \tilde{d}_j - \sum_{q=1}^Q \rho_{jq} \tilde{d}_j^q \right\} \right\} + \sum_{i=1}^I [(\beta_i - \lambda_i) y_i]_+ \right] = F(\alpha, \beta), \end{aligned}$$

696 where the first equality follows from the definition of  $(t, s, r, p)$  and the second equality follows from the  
 697 optimality conditions stated in Lemma 2.

698 Second, pick any feasible solution  $(t, s, r, p)$  to formulation (7). We construct an  $(\alpha, \beta) \in \Lambda$  that satisfies the  
 699 optimality conditions (a)–(b) in Lemma 2 and  $F(\alpha, \beta)$  equals the objective function value (7a) of  $(t, s, r, p)$ .  
 700 Specifically, for all  $j \in [J]$ , we let  $\alpha_j = \sum_{k=1}^j c_k^x t_{jk}$  and, for all  $i \in [I]$ ,  $\beta_i = -\sum_{k=1}^{J(i)} c_k^x s_{ik}$ . Then, for all  $i \in [I]$   
 701 and  $j \in P_i$ ,

$$\begin{aligned} \beta_i + \alpha_j &= -\sum_{k=1}^{J(i)} c_k^x s_{ik} + \sum_{k=1}^j c_k^x t_{jk} \leq -\sum_{k=1}^{J(i)} c_k^x \left( \sum_{\ell \in P_i: \ell \geq k} t_{\ell k} \right) + \sum_{k=1}^j c_k^x t_{jk} \\ &= -\sum_{\ell \in P_i} \sum_{k=1}^{\ell} c_k^x t_{\ell k} + \sum_{k=1}^j c_k^x t_{jk} = -\sum_{\ell \in P_i \setminus \{j\}} \sum_{k=1}^{\ell} c_k^x t_{\ell k} \leq 0, \end{aligned}$$

702 where the first inequality is due to constraints (6c), and the last inequality is due to  $c_k^x, t_{\ell k} \geq 0$ . Next, we have  
 703  $\alpha_j \in \{0, c_1^x, \dots, c_j^x\}$  for all  $j \in [J]$  due to constraints (7b), and  $\beta_i \in \{0, -c_1^x, \dots, -c_{J(i)}^x\}$  for all  $i \in [I]$ . Hence,  
 704  $(\alpha, \beta) \in \Lambda$  and satisfies optimality condition (a). It remains to show that the constructed  $(\alpha, \beta)$  satisfies  
 705 optimality condition (b).

706 For all  $i \in [I]$ , if  $\sum_{k=1}^{J(i)} s_{ik} = 0$ , i.e.,  $\beta_i = 0$ , then  $t_{jk} = 0$  for all  $j \in P_i$  and  $k \in [j]$  due to constraints (6e).  
 707 It follows that  $\alpha_j = 0$  for all  $j \in P_i$  and so  $\beta_i = -\max\{\alpha_j : j \in P_i\} = 0$ . On the other hand, if  $\sum_{k=1}^{J(i)} s_{ik} = 1$ ,  
 708 there exists a  $k^* \in [J(i)]$  with  $s_{ik^*} = 1$ , i.e.,  $\beta_i = -c_{k^*}^x$ . By constraints (6c) and (6d),  $\sum_{j \in P_i: j \geq k^*} t_{jk^*} \geq 1$   
 709 and  $t_{j\ell} = 0$  for all  $j \in P_i : j \geq k^* + 1$  and  $\ell \in [k^* + 1, j]_{\mathbb{Z}}$ . It follows that  $\max\{\alpha_j : j \in P_i\} = c_{k^*}^x$  and so  
 710  $\beta_i = -\max\{\alpha_j : j \in P_i\} = -c_{k^*}^x$ . Hence,  $(\alpha, \beta)$  satisfies the optimality conditions (b). Finally,

$$\begin{aligned} F(\alpha, \beta) &= \sum_{j=1}^J \left\{ \left[ -\sum_{k=1}^j c_k^x t_{jk} - \gamma_j \right] w_j \right\}_+ + \max_{\tilde{d}_j \in [d_j^L, d_j^U]_{\mathbb{Z}}} \left\{ \left( \sum_{k=1}^j c_k^x t_{jk} \right) \tilde{d}_j - \sum_{q=1}^Q \rho_{jq} \tilde{d}_j^q \right\} \\ &\quad + \sum_{i=1}^I \left[ \left( -\sum_{k=1}^{J(i)} c_k^x s_{ik} - \lambda_i \right) y_i \right]_+ \\ &= \sum_{j=1}^J \left( c_j^r r_j + \sum_{k=1}^j c_{jk}^t t_{jk} \right) + \sum_{i=1}^I \left( c_i^p p_i + \sum_{k=1}^{J(i)} c_{ik}^s s_{ik} \right) \end{aligned}$$

711 by the definition of  $(\alpha, \beta)$  and constraints (7b). This completes the proof.  $\square$

712

## 713 Appendix F: Proof of Proposition 2

714 *Proof:* Let  $G(\gamma, \lambda, \rho)$  be the objective function of problem (5a)–(5b),  $(\hat{\gamma}, \hat{\lambda}, \hat{\rho})$  be any feasible solution, and  $S^*$   
 715 be the set of optimal solution to problem  $\max_{(\alpha, \beta) \in \Lambda} F(\alpha, \beta)$  for the given  $(\hat{\gamma}, \hat{\lambda}, \hat{\rho})$ . Suppose that there exists  
 716 a  $j \in [J]$  such that  $\hat{\gamma}_j < -c_j^x$ . Then,  $-\hat{\gamma}_j - \alpha_j^* > 0$  and  $[(-\hat{\gamma}_j - \alpha_j^*) w_j]_+ = (-\hat{\gamma}_j - \alpha_j^*) w_j$  for all  $(\alpha^*, \beta^*) \in S^*$   
 717 because  $\alpha_j^* \leq c_j^x$  by (4c). Additionally, due to Lemma 2, we can replace polyhedron  $\Lambda$  by the (compact) set of  
 718 its extreme points  $\text{ex}(\Lambda)$  without loss of optimality, i.e.,  $\max_{(\alpha, \beta) \in \Lambda} F(\alpha, \beta) = \max_{(\alpha, \beta) \in \text{ex}(\Lambda)} F(\alpha, \beta)$ . It then  
 719 follows from Theorem 2.87 in Ruszczyński (2006) that, for all subgradient  $\varpi \in \partial G(\hat{\gamma}, \hat{\lambda}, \hat{\rho})$ , the entry in  $\varpi$   
 720 with regard to variable  $\gamma_j$  at  $(\hat{\gamma}, \hat{\lambda}, \hat{\rho})$  equals  $f_j(w_j) - w_j$ , i.e.,  $\varpi(\gamma_j)|_{(\hat{\gamma}, \hat{\lambda}, \hat{\rho})} = f_j(w_j) - w_j \leq 0$ . Noting that  
 721  $\varpi(\gamma_j)|_{(\hat{\gamma}, \hat{\lambda}, \hat{\rho})} \leq 0$  holds valid whenever  $\hat{\gamma}_j < -c_j^x$ , we can increase  $\hat{\gamma}_j$  to  $-c_j^x$  without any loss of optimality.

722 Now suppose that  $\hat{\gamma}_j > 0$ . Then, we have  $-\hat{\gamma}_j - \alpha_j^* < 0$  and  $[(-\hat{\gamma}_j - \alpha_j^*) w_j]_+ = 0$  for all  $(\alpha^*, \beta^*) \in S^*$  because  
 723  $\alpha_j^* \geq 0$  by (4c). It follows from a similar implication as in the previous paragraph that, for all subgradient  
 724  $\varpi \in \partial G(\hat{\gamma}, \hat{\lambda}, \hat{\rho})$ , we have  $\varpi(\gamma_j)|_{(\hat{\gamma}, \hat{\lambda}, \hat{\rho})} = f_j(w_j) \geq 0$ . Noting that this holds valid whenever  $\hat{\gamma}_j > 0$ , we can

725 decrease  $\hat{\gamma}_j$  to 0 without any loss of optimality. Therefore, there exists an optimal solution  $(\gamma^*, \lambda^*, \rho^*)$  to  
 726 problem (5a)–(5b) such that  $\gamma_j^* \in [-c_j^x, 0]$  for all  $j \in [J]$ .

727 Following a similar proof, we can show that there exists an optimal solution  $(\gamma^*, \lambda^*, \rho^*)$  to problem  
 728 (5a)–(5b) such that  $\lambda_i^* \in [-c_{J(i)}^x, 0]$  for all  $i \in [I]$ . We omit the details for the sake of saving space.  $\square$

729

### 730 Appendix G: Proof of Theorem 3

731 *Proof:* In each iteration of Algorithm 1, we solve a relaxation of the (DRNS) reformulation (9a)–(9d). It  
 732 follows that, if the algorithm stops in an iteration and returns a solution  $(u^*, v^*)$  then  $(u^*, v^*)$  satisfies all the  
 733 constraints (9c) because of Step 5. Then,  $(u^*, v^*)$  is feasible to formulation (9a)–(9d) and meanwhile optimal  
 734 to its relaxation. Hence,  $(u^*, v^*)$  is optimal to formulation (9a)–(9d), i.e., optimal to (DRNS).

735 It remains to show that Algorithm 1 stops in a finite number of iterations. To see this, we notice that the  
 736 set  $\mathcal{H}$  contains a finite number of elements. Indeed, binary variables  $t$  and  $s$  only have a finite number of  
 737 possible values. Although  $r$  and  $p$  are continuous variables, they also only have a finite number of possible  
 738 values due to constraints (7b).  $\square$

739

### 740 Appendix H: Proof of Lemma 3

741 *Proof:* Pick any  $i \in [I]$ . We note that  $\sum_{\ell=1}^{J(i)} s_{i\ell} \in \{0, 1\}$  due to constraints (6b) and discuss the following three  
 742 cases. First, if  $\sum_{\ell=1}^{J(i)} s_{i\ell} = 0$ , i.e.,  $s_{i\ell} = 0$  for all  $\ell \in [J(i)]$ , then  $t_{jk} = 0$  for all  $j \in P_i$  and  $k \in [j]$  by constraints  
 743 (6e). In this case, inequalities (10) are valid because both left-hand and right-hand sides of (10) are 0. Second,  
 744 if  $\sum_{\ell=1}^{J(i)} s_{i\ell} = 1$  and  $\sum_{\ell=k}^{J(i)} s_{i\ell} = 1$ , then inequalities (10) reduce to  $\sum_{\ell=k}^j t_{j\ell} \leq 1$  for all  $j \in P_i$  with  $j \geq k$ , which  
 745 are valid due to constraints (6a). Third, if  $\sum_{\ell=1}^{J(i)} s_{i\ell} = 1$  and  $\sum_{\ell=k}^{J(i)} s_{i\ell} = 0$ , then there exists a  $k^* < k$  such  
 746 that  $s_{ik^*} = 1$ . By constraints (6d),  $t_{j\ell} = 0$  for all  $j \in P_i$  with  $j \geq k^* + 1$  and for all  $\ell \in [k^* + 1, j]_{\mathbb{Z}}$ . It follows  
 747 that both left-hand and right-hand sides of (10) are 0, and so inequalities (10) are valid.

748 Finally, inequalities (10) imply constraints (6e) because

$$t_{jk} \leq \sum_{\ell=k}^j t_{j\ell} \leq \sum_{\ell=k}^{J(i)} s_{i\ell} \leq \sum_{\ell=1}^{J(i)} s_{i\ell}, \quad \forall i \in [I], \forall j \in P_i, \forall k \in [j].$$

749

750

### 751 Appendix I: Proof of Proposition 3

752 We first show that  $\bar{\mathcal{H}}_1 \subseteq \text{conv}(\mathcal{H}_1)$ . To prove this, we pick any fractional solution  $(\hat{s}, \hat{t})$  that satisfies constraints  
 753 (11b)–(11d), (12a), and (12b) in  $\bar{\mathcal{H}}_1$ , and find a finite number of points  $\{(s^1, t^1), \dots, (s^n, t^n)\}$  such that: (i)  
 754 each  $(s^i, t^i)$  is binary-valued and satisfies constraints (11b)–(11g) in  $\mathcal{H}_1$  and (ii) their convex combination  
 755 produces  $(\hat{s}, \hat{t})$ , i.e., we find nonnegative weights  $\{\pi^i : i \in [n]\}$  with  $\sum_{i=1}^n \pi^i = 1$  such that  $\hat{s}_k = \sum_{i=1}^n \pi^i s_k^i$  for  
 756 all  $k \in [J]$  and  $\hat{t}_{jk} = \sum_{i=1}^n \pi^i t_{jk}^i$  for all  $j \in [J]$  and  $k \in [j]$ .

757 To this end, we develop Algorithm 2, which iteratively constructs binary points  $\{(s^i, t^i) : i \in [n]\}$  and  
 758 weights  $\{\pi^i : i \in [n]\}$ . This algorithm initializes by setting an incumbent  $(\hat{s}^1, \hat{t}^1) := (\hat{s}, \hat{t})$  and, in each iteration  
 759  $i \in [n]$ , update the incumbent  $(\hat{s}^{i+1}, \hat{t}^{i+1}) := (\hat{s}^i - \pi^i s^i, \hat{t}^i - \pi^i t^i)$  as it constructs a new binary point  $(s^i, t^i)$

with weight  $\pi^i$ , till the incumbent becomes  $(0, 0)$ . For ease of exposition, we assume in Algorithm 2 that optimizing over an empty set yields zero, i.e.,  $\max\{f(x) : x \in \emptyset\} = 0$ . In addition, we provide an example of implementing Algorithm 2 at the end of this section. We show the correctness of Algorithm 2 by proving its properties in Theorem 6. Specifically, Theorem 6 shows that each point  $(s^i, t^i)$  found by Algorithm 2 lies in  $\mathcal{H}_1$  and has a weight  $\pi^i \in [0, 1]$ . In addition, after finding all  $n$  points and their weights, the incumbent reduces to zero, that is,  $(\hat{s}, \hat{t}) - \sum_{i=1}^n \pi^i \cdot (s^i, t^i) = (0, 0)$ .

**THEOREM 6.** *For each binary point  $(s^i, t^i)$  produced in Algorithm 2, the following properties hold:*

1.  $(s^i, t^i)$  satisfies constraints (11b)–(11g) in  $\mathcal{H}_1$ .

2. In line 6, the weight  $\pi^i \in (0, 1]$ .

3. In line 7, the updated fractional solution  $(\hat{s}^{i+1}, \hat{t}^{i+1})$  satisfies constraints (11b)–(11d), (12a), and (12b) in  $\overline{\mathcal{H}}_1$ .

In a finite number of iterations, Algorithm 2 terminates with the following properties:

4. After we execute line 7 for the last time,  $\hat{s}_k^n = 0$  for all  $k \in [J]$  and  $\hat{t}_{jk}^n = 0$  for all  $j \in [J]$  and  $k \in [j]$ .

5.  $\pi^n \in [0, 1)$ .

Therefore,  $(\hat{s}, \hat{t})$  is a convex combination of  $\{(s^1, t^1), \dots, (s^n, t^n)\}$  with weights  $\pi^1, \dots, \pi^n$ , respectively.

*Proof:* See Appendix J. □

It follows from Theorem 6 that  $\overline{\mathcal{H}}_1 \subseteq \text{conv}(\mathcal{H}_1)$ . On the other hand,  $\text{conv}(\mathcal{H}_1) \subseteq \overline{\mathcal{H}}_1$  because  $\mathcal{H}_1 \subseteq \overline{\mathcal{H}}_1$  by construction. Therefore,  $\overline{\mathcal{H}}_1 = \text{conv}(\mathcal{H}_1)$  and this completes the proof. □

## Appendix J: Proof of Theorem 6

*Proof:* We first prove Property 3 and then use it to prove all other properties.

**(Property 3)** We prove by mathematical induction. It is clear that  $(\hat{s}^1, \hat{t}^1) \equiv (\hat{s}, \hat{t})$  satisfies Property 3. It remains to show that  $(\hat{s}^{i+1}, \hat{t}^{i+1})$  satisfies constraints (11b)–(11d), (12a), and (12b) under the assumption that they are satisfied by  $(\hat{s}^i, \hat{t}^i)$ . Before getting into details, we rewrite the construction of  $(\hat{s}^{i+1}, \hat{t}^{i+1})$  based on line 5 as follows:

$$\hat{s}_k^{i+1} = \begin{cases} \hat{s}_k^i & \text{if } k \in [m-1] \\ \hat{s}_m^i - \pi^i & \text{if } k = m \\ \hat{s}_k^i & \text{if } k \in [m+1, J]_{\mathbb{Z}} \end{cases}, \quad \hat{t}_{jk}^{i+1} = \begin{cases} \hat{t}_{jk}^i & \text{if } k \in [m-1], j \in [k, J]_{\mathbb{Z}} : k < \text{Index}(j) \\ \hat{t}_{jk}^i - \pi^i & \text{if } k \in [m-1], j \in [k, J]_{\mathbb{Z}} : k = \text{Index}(j) \\ 0 & \text{if } k \in [m-1], j \in [k, J]_{\mathbb{Z}} : k > \text{Index}(j) \\ \hat{t}_{jm}^i - \pi^i & \text{if } k = m, j \in A_m \\ \hat{t}_{jm}^i & \text{if } k = m, j \in B_m \\ \hat{t}_{jk}^i & \text{if } k \in [m+1, J]_{\mathbb{Z}}, j \in [k, J]_{\mathbb{Z}} \end{cases}. \quad (24)$$

First, we consider constraints (12b). We notice that  $\hat{s}_k^{i+1} \geq 0$  for all  $k \in [J]$  because  $\pi^i \leq \hat{s}_m^i$  by construction. Likewise,  $\hat{t}_{jk}^{i+1} \geq 0$  for all  $j \in [J]$  and  $k \in [j]$ .

Second, we consider constraint (11c). By (24), we have  $\sum_{k=1}^J \hat{s}_k^{i+1} = \sum_{k=1}^J \hat{s}_k^i - \pi^i \leq \sum_{k=1}^J \hat{s}_k^i \leq 1$  because  $\pi^i \geq 0$  by construction.

Third, we consider constraints (11b). By (24), for all  $j \in [J]$ , we have  $\sum_{k=1}^j \hat{t}_{jk}^{i+1} = \sum_{k=1}^j \hat{t}_{jk}^i - \mathbb{1}(\text{Index}(j) \neq 0) \pi^i \leq \sum_{k=1}^j \hat{t}_{jk}^i \leq 1$  because  $\pi^i \geq 0$  by construction.

---

**Algorithm 2** Finding binary points  $\{(s^1, t^1), \dots, (s^n, t^n)\}$  and their weights  $\{\pi^1, \dots, \pi^n\}$ 


---

1: **Initialization:**  $i = 1$ , and  $\hat{s}_k^1 = \hat{s}_k, \forall k \in [J], \hat{t}_{jk}^1 = \hat{t}_{jk}, \forall j \in [J], \forall k \in [j]$ .

2: **for**  $m = 1 : J$  **do**

3:   **while**  $\hat{s}_m^i > 0$  **do**

4:     **Find:**

$$j^* = \min \{j \in [m, J]_{\mathbb{Z}} : \hat{t}_{jm}^i > 0\},$$

$$A_m = \{j^*\} \cup \left\{ j \in [m, J]_{\mathbb{Z}} : \sum_{\ell=m}^j \hat{t}_{j\ell}^i = \sum_{\ell=m}^j \hat{s}_{\ell}^i \right\}, \quad B_m = [m, J]_{\mathbb{Z}} \setminus A_m,$$

$$\text{Index}(j) = \begin{cases} m & \forall j \in A_m, \\ \max \{k \in [\min\{j, m-1\}] : \hat{t}_{jk}^i > 0\} & \forall j \in B_m \cup [m-1]. \end{cases}$$

5:     **Construct a binary point**  $(s^i, t^i)$ :

$$s_k^i = \begin{cases} 1 & \text{if } k = m \\ 0 & \text{otherwise} \end{cases}, \quad \forall k \in [J], \quad \text{and} \quad t_{jk}^i = \begin{cases} 1 & \text{if } k = \text{Index}(j) \neq 0 \\ 0 & \text{otherwise} \end{cases}, \quad \forall j \in [J], \forall k \in [j].$$

6:     **Construct a weight**  $\pi^i$ :

$$\pi^i = \min \left\{ \sum_{\ell=m}^j \hat{s}_{\ell}^i - M_m, \hat{s}_m^i, \hat{t}_{j, \text{Index}(j)}^i, \forall j \in [J] : \text{Index}(j) \neq 0 \right\},$$

where  $M_m = \max \left\{ \sum_{\ell=m}^j \hat{t}_{j\ell}^i : j \in B_m \right\}$ .

7:     **Update the fractional solution**  $(\hat{s}^{i+1}, \hat{t}^{i+1})$ :

$$\hat{s}_k^{i+1} = \hat{s}_k^i - \pi^i s_k^i, \quad \forall k \in [J] \quad \text{and} \quad \hat{t}_{jk}^{i+1} = \hat{t}_{jk}^i - \pi^i t_{jk}^i, \quad \forall j \in [J], \forall k \in [j].$$

8:     **Update:**  $i = i + 1$ .

9:     **end while**

10: **end for**

11: **Set:**  $n = i, \pi^n = 1 - (\pi^1 + \dots + \pi^{n-1}), s_k^n = 0, \forall k \in [J],$  and  $t_{jk}^n = 0, \forall j \in [J], \forall k \in [j]$ .

---

792   Fourth, we consider constraints (12a). For fixed  $k \in [J]$  and  $j \in [k, J]_{\mathbb{Z}}$ , we rewrite each term in (12a) as  
 793 follows:

$$\sum_{\ell=k}^j \hat{s}_{\ell}^{i+1} = \begin{cases} \sum_{\ell=k}^j \hat{s}_{\ell}^i - \pi^i & \text{if } k \in [m] \\ \sum_{\ell=k}^j \hat{s}_{\ell}^i & \text{if } k \in [m+1, J]_{\mathbb{Z}} \end{cases}, \quad (25a)$$

$$\sum_{\ell=k}^j \hat{t}_{j\ell}^{i+1} = \begin{cases} \sum_{\ell=k}^j \hat{t}_{j\ell}^i - \pi^i & \text{if } k \in [m-1], j \in [k, m-1]_{\mathbb{Z}} : k \leq \text{Index}(j) \\ 0 & \text{if } k \in [m-1], j \in [k, m-1]_{\mathbb{Z}} : k > \text{Index}(j) \\ \sum_{\ell=k}^j \hat{t}_{j\ell}^i - \pi^i & \text{if } j \in A_m, k \in [m] \\ \sum_{\ell=k}^j \hat{t}_{j\ell}^i & \text{if } j \in A_m, k \in [m+1, j]_{\mathbb{Z}} \\ \sum_{\ell=k}^j \hat{t}_{j\ell}^i - \pi^i & \text{if } j \in B_m, k \in [j] : k \leq \text{Index}(j) \\ \sum_{\ell=k}^j \hat{t}_{j\ell}^i & \text{if } j \in B_m, k \in [j] : k > \text{Index}(j) \end{cases}. \quad (25b)$$

794 We prove by enumerating all 6 cases of  $\sum_{\ell=k}^j \hat{t}_{j\ell}^{i+1}$  in (25b). In cases 1 and 3, (12a) is satisfied because  
 795  $\sum_{\ell=k}^j \hat{t}_{j\ell}^i - \pi^i \leq \sum_{\ell=k}^J \hat{s}_\ell^i - \pi^i$ , which follows from the induction assumption that  $(\hat{s}^i, \hat{t}^i)$  satisfies (12a). Like-  
 796 wise, (12a) is satisfied in cases 4 and 5. In case 2, (12a) is satisfied because  $\pi^i \leq \hat{s}_m^i \leq \sum_{\ell=k}^J \hat{s}_\ell^i$ . In case 6,  
 797 we discuss the following two sub-cases: (i) If  $k \geq m + 1$ , then (12a) is satisfied because  $\sum_{\ell=k}^j \hat{t}_{j\ell}^i \leq \sum_{\ell=k}^J \hat{s}_\ell^i$   
 798 by the induction assumption. (ii) If  $\text{Index}(j) < k \leq m$ , then  $\sum_{\ell=k}^j \hat{t}_{j\ell}^i = \sum_{\ell=m}^j \hat{t}_{j\ell}^i$  by definition of  $\text{Index}(j)$ . It  
 799 follows that  $\pi^i \leq \sum_{\ell=m}^J \hat{s}_\ell^i - M_m \leq \sum_{\ell=k}^J \hat{s}_\ell^i - \sum_{\ell=m}^j \hat{t}_{j\ell}^i$ , where the first inequality is due to the definition of  
 800  $\pi^i$  and the second inequality is due to that of  $M_m$ . This proves that  $(\hat{s}^{i+1}, \hat{t}^{i+1})$  satisfies (12a).

801 Finally, we consider constraints (11d). By (24), we rewrite the right-hand side of constraints (11d) as  
 802 follows:

$$\sum_{j=k}^J \hat{t}_{jk}^{i+1} = \begin{cases} \sum_{j=k}^J (\hat{t}_{jk}^i - \mathbb{1}_{\text{Index}(j)}(k)\pi^i) & \text{if } k \in [m-1] \\ \sum_{j=m}^J \hat{t}_{jm}^i - \pi^i & \text{if } k = m \text{ and } A_m = \{j^*\} \\ \sum_{j=m}^J \hat{t}_{jm}^i - \sum_{j \in A_m} \pi^i & \text{if } k = m \text{ and } A_m \supset \{j^*\} \\ \sum_{j=k}^J \hat{t}_{jk}^i & \text{if } k \in [m+1, J]_{\mathbb{Z}} \end{cases}, \quad (26)$$

803 where  $\mathbb{1}_{\text{Index}(j)}(k) = 1$  if  $k = \text{Index}(j)$  and  $\mathbb{1}_{\text{Index}(j)}(k) = 0$  otherwise. We prove by enumerating all 4 cases of  
 804  $\sum_{j=k}^J \hat{t}_{jk}^{i+1}$  in (26). In case 1, we notice that (i)  $\hat{s}_k^i = 0, \forall k \in [m-1]$  due to line 3, (ii)  $\hat{t}_{jk}^i \geq 0$  for all  $j \in [k, J]_{\mathbb{Z}}$ ,  
 805 and (iii)  $\pi^i \leq \hat{t}_{j, \text{Index}(j)}^i, \forall j \in [J] : \text{Index}(j) \neq 0$  by the definition of  $\pi^i$ . Therefore, (11d) is satisfied:

$$\hat{s}_k^{i+1} = \hat{s}_k^i = 0 \leq \sum_{j=k}^J (\hat{t}_{jk}^i - \mathbb{1}_{\text{Index}(j)}(k)\pi^i) = \sum_{j=k}^J \hat{t}_{jk}^{i+1}.$$

806 In case 2, (11d) is satisfied because  $\hat{s}_m^i - \pi^i \leq \sum_{j=m}^J \hat{t}_{jm}^i - \pi^i$ , which follows from the induction assumption  
 807 that  $(\hat{s}^i, \hat{t}^i)$  satisfies (11d). In case 3, we notice that  $\sum_{\ell=m}^j \hat{t}_{j\ell}^i = \sum_{\ell=m}^J \hat{s}_\ell^i$  for all  $j \in A_m \setminus \{j^*\} \neq \emptyset$ . As  
 808  $\sum_{\ell=m+1}^j \hat{t}_{j\ell}^i \leq \sum_{\ell=m+1}^J \hat{s}_\ell^i$  because  $(\hat{s}^i, \hat{t}^i)$  satisfies (12a) by the induction assumption, we have  $\hat{t}_{jm}^i \geq \hat{s}_m^i, \forall j \in$   
 809  $A_m \setminus \{j^*\}$ . Then,  $\hat{s}_m^i - \pi^i \leq \sum_{j \in A_m \setminus \{j^*\}} (\hat{t}_{jm}^i - \pi^i) + (\hat{t}_{j^*m}^i - \pi^i)$ , where  $\hat{t}_{jm}^i - \pi^i \geq 0$  for all  $j \in A_m \setminus \{j^*\}$  and  
 810  $\hat{t}_{j^*m}^i - \pi^i \geq 0$  by the definition of  $\pi^i$ . It follows that (11d) is satisfied:

$$\hat{s}_k^{i+1} = \hat{s}_m^i - \pi^i \leq \sum_{j \in A_m} (\hat{t}_{jm}^i - \pi^i) \leq \sum_{j=m}^J \hat{t}_{jm}^i - \sum_{j \in A_m} \pi^i = \sum_{j=k}^J \hat{t}_{jk}^{i+1}.$$

811 In case 4, (11d) is satisfied because  $\hat{s}_k^i \leq \sum_{j=k}^J \hat{t}_{jk}^i$ , which follows from the induction assumption that  $(\hat{s}^i, \hat{t}^i)$   
 812 satisfies (11d).

813 **(Property 1)** By construction,  $(s^i, t^i)$  produced in line 5 satisfies constraints (11b), (11c), and (11g). It  
 814 remains to show constraints (11d)–(11f), which reduce to the following inequalities as we set  $s_m^i = 1$ :

$$1 \leq \sum_{j=m}^J t_{jm}^i, \quad (27a)$$

$$t_{j\ell}^i \leq 0, \forall \ell \in [m+1, J]_{\mathbb{Z}}, \forall j \in [\ell, J]_{\mathbb{Z}}. \quad (27b)$$

815 To that end, we note from line 4 that for all  $j \in [J]$ ,  $\text{Index}(j) \in [0, m]_{\mathbb{Z}}$ . This implies that, in line 5,  $t_{j\ell}^i = 0$  for  
 816 all  $\ell \in [m+1, J]_{\mathbb{Z}}$  and  $j \in [\ell, J]_{\mathbb{Z}}$ . This proves (27b). To see (27a), we notice that the construction of  $(s^i, t^i)$   
 817 implies that  $\hat{s}_m^i > 0$  in line 3. Then, Property 3 implies that  $\sum_{j=m}^J \hat{t}_{jm}^i \geq \hat{s}_m^i > 0$ . It follows that, in line 5, we  
 818 are able to find a non-empty  $A_m$  and so there exists a  $j \in [m, J]_{\mathbb{Z}}$  such that  $t_{jm}^i = 1$ . This proves (27a).

819 **(Property 2)** To show that weight  $\pi^i > 0$ , it suffices to check that each term in the definition of  $\pi^i$  in line  
 820 6 is positive. First, by Property 3 and the definition of  $B_m$  in line 4, we have  $\sum_{\ell=m}^j \hat{t}_{j\ell}^i < \sum_{\ell=m}^J \hat{s}_\ell^i, \forall j \in B_m$ ,

821 which implies that  $\sum_{\ell=m}^J \hat{s}_\ell^i - M_m = \sum_{\ell=m}^J \hat{s}_\ell^i - \max_{j \in B_m} \{\sum_{\ell=m}^j \hat{t}_{j\ell}^i\} > 0$ . Second,  $\hat{s}_m^i > 0$  due to line 3. It  
 822 remains to show that  $\hat{t}_{j, \text{Index}(j)}^i > 0, \forall j \in [J] : \text{Index}(j) \neq 0$ . By noting that  $[J] = A_m \cup B_m \cup [m-1]$ , we  
 823 consider the following three cases: (i)  $j \in B_m \cup [m-1]$ , (ii)  $j = j^*$ , and (iii)  $j \in A_m \setminus \{j^*\} \neq \emptyset$ . In case (i),  
 824  $\text{Index}(j) \neq 0$  implies that the set  $\{k \in [\min\{j, m-1\}] : \hat{t}_{jk}^i > 0\} \neq \emptyset$ , and thus  $\hat{t}_{j, \text{Index}(j)}^i > 0$ . In case (ii), we  
 825 have  $\hat{t}_{j^*, \text{Index}(j^*)}^i = \hat{t}_{j^*m}^i > 0$  by the definition of  $j^*$ . In case (iii),  $\sum_{\ell=m}^j \hat{t}_{j\ell}^i = \sum_{\ell=m}^j \hat{s}_\ell^i$  as  $j \in A_m \setminus \{j^*\}$ . Since  
 826  $\sum_{\ell=m+1}^j \hat{t}_{j\ell}^i \leq \sum_{\ell=m+1}^j \hat{s}_\ell^i$  by Property 3,  $\hat{t}_{jm}^i \geq \hat{s}_m^i > 0$ . This indicates that  $\hat{t}_{j, \text{Index}(j)}^i = \hat{t}_{jm}^i > 0$ . Finally,  $\pi^i \leq 1$   
 827 because each term in the definition of  $\pi^i$  is less than or equal to 1 by construction.

828 **(Property 4)** We claim that, for all  $m \in [J]$ , the while loop in line 3 terminates in a finite number of  
 829 iterations, i.e.,  $\hat{s}_m^i$  becomes zero after a finite number of updates in line 7. It follows from this claim that  
 830 Algorithm 2 terminates in a finite number of iterations. Accordingly, as  $\hat{s}_k^n = 0, \forall k \in [J]$  at termination, we  
 831 have  $\hat{t}_{jk}^n = 0, \forall j \in [J], \forall k \in [j]$  because  $(\hat{s}^n, \hat{t}^n)$  satisfies constraints (12a) by Property 3.

832 To see the claim, we consider the value of  $\pi^i$  returned by the minimum comparison in line 6. In particular,  
 833 we distinguish between two cases: (A)  $\pi^i = \hat{s}_m^i$  or  $\pi^i = \hat{t}_{j, \text{Index}(j)}^i$  for a  $j \in [J]$  with  $\text{Index}(j) \neq 0$ , and (B)  $\pi^i =$   
 834  $\sum_{\ell=m}^J \hat{s}_\ell^i - M_m$ , and in addition,  $\pi^i < \hat{s}_m^i$  and  $\pi^i < \hat{t}_{j, \text{Index}(j)}^i$  for all  $j \in [J]$  with  $\text{Index}(j) \neq 0$ . We notice that  
 835  $\hat{s}_m^i$  will be updated to zero in line 7 after case (A) takes place for a finite number of times. This is because we  
 836 only have a finite number of positive values among  $\{\hat{s}_k^i : k \in [m]\}$  and  $\{\hat{t}_{jk}^i : k \in [m], j \in [k, J]_{\mathbb{Z}}\}$ . Now suppose  
 837 that case (B) takes place. In this case, as  $\pi^i = \sum_{\ell=m}^J \hat{s}_\ell^i - M_m < \hat{s}_m^i$ , we know that  $M_m > 0$  and so there exists  
 838 a  $j \in B_m$  such that  $M_m = \sum_{\ell=m}^j \hat{t}_{j\ell}^i$ . Then, after the update in line 7, we have  $\sum_{\ell=m}^j \hat{t}_{j\ell}^{i+1} = \sum_{\ell=m}^j \hat{t}_{j\ell}^i = M_m$   
 839 and  $\sum_{\ell=m}^J \hat{s}_\ell^{i+1} = \sum_{\ell=m}^J \hat{s}_\ell^i - \pi^i = M_m$ . It follows that  $\sum_{\ell=m}^j \hat{t}_{j\ell}^{i+1} = \sum_{\ell=m}^j \hat{s}_\ell^{i+1}$ , increasing the cardinality of  
 840  $A_m$  by 1. Since  $|A_m| \leq J - m + 1$ , this indicates that case (B) can take place for at most  $(J - m + 1)$  times  
 841 before case (A) takes place. Therefore, the claim holds valid.

842 **(Property 5)** By construction of the binary point in line 5, vectors  $\hat{s}^{i+1}$  and  $\hat{s}^i$  are only different in the  
 843  $m^{\text{th}}$  entry, i.e.,  $\hat{s}_m^{i+1} = \hat{s}_m^i - \pi^i$  and  $\hat{s}_k^{i+1} = \hat{s}_k^i$  for all  $k \neq m$ . It follows that in line 10, i.e., when the for  
 844 loop terminates,  $0 < \sum_{i=1}^{n-1} \pi^i = \sum_{m=1}^J \hat{s}_m \leq 1$ , where the first inequality is due to Property 2 and the last  
 845 inequality is due to Property 3. It follows that  $\pi^n \equiv 1 - \sum_{i=1}^{n-1} \pi^i \in [0, 1)$ .  $\square$

846

## 847 Appendix K: Proof of Theorem 4

848 *Proof:* Under Structure 1,  $\max_{(\alpha, \beta) \in \Lambda} F(\alpha, \beta)$  can be reformulated as the following linear program:

$$\begin{aligned}
 \max_{(\alpha, \beta) \in \Lambda} F(\alpha, \beta) &= \max_{(t, s, r, p) \in \overline{\mathcal{H}}_1} \sum_{j=1}^J \left( c_j^r r_j + \sum_{k=1}^j c_{jk}^t t_{jk} \right) + c_1^p p + \sum_{k=1}^J c_{1k}^s s_k \\
 &= c_1^p + \sum_{j=1}^J c_j^r + \max_{s \geq 0: (11c)} \left[ \sum_{k=1}^J (c_{1k}^s - c_1^p) s_k + \left\{ \max_{t \geq 0} \sum_{j=1}^J \sum_{k=1}^j (c_{jk}^t - c_j^r) t_{jk} \right\} \right] \\
 &\quad \text{s.t. (11b), (11d), (12a)}.
 \end{aligned} \tag{28}$$

849 An optimal solution  $(s^*, t^*)$  to (28) is integral as  $\overline{\mathcal{H}}_1 = \text{conv}(\mathcal{H}_1)$  is an integral polyhedron. Specifically, by  
 850 constraints (11c), we have  $s^* \in \{0\} \cup \{e_k : k \in [J]\}$ , where  $e_k$  is the  $k^{\text{th}}$  standard basis vector, and for given  
 851  $s^*$ , the inner maximization problem in (28) finds an optimal  $t^*$ , which is also integral. We rewrite (28) by  
 852 discussing two cases of  $s^*$ : (i)  $s^* = 0$  and (ii)  $s^* \in \{e_k : k \in [J]\}$ .

853 In case (i), we have  $t_{jk}^* = 0$  for all  $j \in [J]$  and  $k \in [j]$  by constraints (12a). Then, (28) reduces to  $c_1^p + \sum_{j=1}^J c_j^r$ .

854 In case (ii),  $s_{k^*} = 1$  for some  $k^* \in [J]$  and  $s_k = 0$  for all  $k \in [J] \setminus \{k^*\}$ . By constraints (12a), we have  $t_{jk} = 0$   
 855 if  $j, k \geq k^* + 1$ . Then, we can rewrite (28) as follows:

$$c_1^p + \sum_{j=1}^J c_j^r + (c_{1k^*}^s - c_1^p) + \max_{t \geq 0} \sum_{j=1}^J \sum_{k=1}^{\min\{j, k^*\}} (c_{jk}^t - c_j^r) t_{jk}$$

$$\text{s.t.} \quad \sum_{k=1}^{\min\{j, k^*\}} t_{jk} \leq 1, \quad \forall j \in [J], \quad 1 \leq \sum_{j=k^*}^J t_{jk^*}.$$

856 By constraint (11b),  $t_{j^*k^*} = 1$  for some  $j^* \in [k^*, J]_{\mathbb{Z}}$  and  $t_{j^*k} = 0$  for all  $k \in [j^*] \setminus \{k^*\}$ . Then, we recast (28)

857 as

$$c_1^p + \sum_{j=1}^J c_j^r + (c_{1k^*}^s - c_1^p) + (c_{j^*k^*}^t - c_{j^*}^r) + \sum_{j \in [J] \setminus \{j^*\}} \max_{t \geq 0} \left\{ \sum_{k=1}^{\min\{j, k^*\}} (c_{jk}^t - c_j^r) t_{jk} \mid \sum_{k=1}^{\min\{j, k^*\}} t_{jk} \leq 1 \right\}$$

$$= \sum_{j=1}^J c_j^r + c_{1k^*}^s + (c_{j^*k^*}^t - c_{j^*}^r) + \sum_{j \in [J] \setminus \{j^*\}} \max_{k \in [\min\{j, k^*\}]} \{c_{jk}^t - c_j^r\}.$$

858 Therefore, we have

$$\max_{(\alpha, \beta) \in \Lambda} F(\alpha, \beta) =$$

$$\max \left\{ c_1^p + \sum_{j=1}^J c_j^r, \max_{\substack{j^* \in [J], \\ k^* \in [j^*]}} \left\{ \sum_{j=1}^J c_j^r + c_{1k^*}^s + (c_{j^*k^*}^t - c_{j^*}^r) + \sum_{j \in [J] \setminus \{j^*\}} \max_{k \in [\min\{j, k^*\}]} \{c_{jk}^t - c_j^r\} \right\} \right\}.$$

859 This completes the proof.  $\square$

860

## 861 Appendix L: Proof of Proposition 4

862 *Proof:* By Theorem 4, constraints (9c) are equivalent to

$$\theta \geq \max \left\{ c_1^p + \sum_{j=1}^J c_j^r, \max_{\substack{j^* \in [J], \\ k^* \in [j^*]}} \left\{ \sum_{j=1}^J c_j^r + c_{1k^*}^s + (c_{j^*k^*}^t - c_{j^*}^r) + \sum_{j \in [J] \setminus \{j^*\}} \left( \max_{k \in [\min\{j, k^*\}]} \{c_{jk}^t - c_j^r\} \right) \right\} \right\}.$$

863 where  $c_j^r$ ,  $c_{jk}^t$ ,  $c_1^p$ , and  $c_{1k}^s$  are computed by (9e)–(9h). Let  $\chi_{jk^*} := \max_{k \in [\min\{j, k^*\}]} \{c_{jk}^t - c_j^r\}$  for all  $j \in [J]$

864 and  $k^* \in [J]$ . Then, constraints (9c) can be rewritten as follows:

$$\theta \geq c_1^p + \sum_{j=1}^J c_j^r, \tag{29a}$$

$$\theta \geq \sum_{j=1}^J c_j^r + c_{1k^*}^s + (c_{j^*k^*}^t - c_{j^*}^r) + \sum_{j \in [J] \setminus \{j^*\}} \chi_{jk^*}, \quad \forall j^* \in [J], \forall k^* \in [j^*], \tag{29b}$$

$$\chi_{jk^*} \geq (c_{jk}^t - c_j^r), \quad \forall j \in [J], \forall k^* \in [J], \forall k \in [\min\{j, k^*\}]. \tag{29c}$$

865 Moreover, we define the following auxiliary variables:

$$\left. \begin{aligned} \zeta_j^e &:= \left[ -\gamma_j w_j^L - \sum_{\ell=1}^{w_j^U - w_j^L} \varphi_{j\ell} \right]_+ \\ \eta_j^e &:= \max_{\tilde{d}_j \in [d_j^L, d_j^U]_{\mathbb{Z}}} \left\{ -\sum_{q=1}^Q \tilde{d}_j^q \rho_{jq} \right\} \end{aligned} \right\} \quad \forall j \in [J], \tag{30a}$$

$$\left. \begin{aligned} \zeta_{jk}^x &:= \left[ (-c_k^x - \gamma_j) w_j^L - \sum_{\ell=1}^{w_j^U - w_j^L} (c_k^x u_{j\ell} + \varphi_{j\ell}) \right]_+ \\ \eta_{jk}^x &:= \max_{\tilde{d}_j \in [d_j^L, d_j^U]_{\mathbb{Z}}} \left\{ c_k^x \tilde{d}_j - \sum_{q=1}^Q \tilde{d}_j^q \rho_{jq} \right\} \end{aligned} \right\} \quad \forall j \in [J], \forall k \in [j], \tag{30b}$$

$$\phi_1^e := \left[ -\lambda_1 y_1^L - \sum_{\ell=1}^{y_1^U - y_1^L} \nu_{1\ell} \right]_+, \quad (30c)$$

$$\phi_{1k}^x := \left[ (-c_k^x - \lambda_1) y_1^L - \sum_{\ell=1}^{y_1^U - y_1^L} (c_k^x \nu_{1\ell} + \nu_{1\ell}) \right]_+, \quad \forall k \in [J], \quad (30d)$$

866 Since  $c_j^x = \zeta_j^e + \eta_j^e$ ,  $c_{jk}^t = \zeta_{jk}^x + \eta_{jk}^x$ ,  $c_1^p = \phi_1^e$ , and  $c_{1k}^s = \phi_{1k}^x$ , constraints (29) can be rewritten as follows:

$$\theta \geq \phi_1^e + \sum_{j=1}^J (\zeta_j^e + \eta_j^e), \quad (31a)$$

$$\theta \geq \sum_{j=1}^J (\zeta_j^e + \eta_j^e) + \phi_{1k^*}^x + (\zeta_{j^*k^*}^x + \eta_{j^*k^*}^x) - (\zeta_{j^*}^e + \eta_{j^*}^e) + \sum_{j \in [J] \setminus \{j^*\}} \chi_{jk^*}, \quad \forall j^* \in [J], \forall k^* \in [j^*], \quad (31b)$$

$$\chi_{jk^*} \geq (\zeta_{jk}^x + \eta_{jk}^x) - (\zeta_j^e + \eta_j^e), \quad \forall j \in [J], \forall k^* \in [j], \forall k \in [\min\{j, k^*\}]. \quad (31c)$$

867 Replacing constraints (9c) with (30)–(31) in the formulation (9a)–(9d) leads to the claimed reformulation  
868 of (DRNS). This completes the proof.  $\square$

869

## 870 Appendix M: Proof of Proposition 5

871 We start by proving the following technical lemma.

872 LEMMA 4. Consider sets  $A_i \subseteq \mathbb{R}^{k_i}$  for all  $i \in [I]$  and let  $A := \prod_{i=1}^I A_i$ . Then,  $\text{conv}(A) = \prod_{i=1}^I \text{conv}(A_i)$ .

873 *Proof:* First, as  $A = \prod_{i=1}^I A_i$  and  $A_i \subseteq \text{conv}(A_i)$ , we have  $A \subseteq \prod_{i=1}^I \text{conv}(A_i)$  and hence  $\text{conv}(A) \subseteq$   
874  $\prod_{i=1}^I \text{conv}(A_i)$  because  $\prod_{i=1}^I \text{conv}(A_i)$  is convex and  $\text{conv}(A)$  by definition is the smallest convex set that  
875 contains  $A$ . Second, to show that  $\prod_{i=1}^I \text{conv}(A_i) \subseteq \text{conv}(A)$ , we pick any  $a \in \prod_{i=1}^I \text{conv}(A_i)$  and prove that  $a \in$   
876  $\text{conv}(A)$ . To this end, we denote  $a := [a_1, \dots, a_I]^\top$ , where  $a_i \in \text{conv}(A_i)$  for all  $i \in [I]$ . Then, for all  $i \in [I]$ , there  
877 exist  $\{\lambda_i^{n_i}\}_{n_i=1}^{N_i}$  and  $\{a_i^{n_i}\}_{n_i=1}^{N_i}$  such that each  $\lambda_i^{n_i} \geq 0$ , each  $a_i^{n_i} \in A_i$ ,  $\sum_{n_i=1}^{N_i} \lambda_i^{n_i} = 1$ , and  $\sum_{n_i=1}^{N_i} \lambda_i^{n_i} a_i^{n_i} = a_i$   
878 for all  $i \in [I]$ .

879 Denote set  $\mathcal{N} := \{(n_1, \dots, n_I) : n_i \in [N_i], \forall i \in [I]\}$ , vector  $a^n := [a_1^{n_1}, \dots, a_I^{n_I}]^\top$  for all  $n := [n_1, \dots, n_I]^\top \in \mathcal{N}$ ,  
880 and scalar  $\lambda^n := \prod_{i=1}^I \lambda_i^{n_i}$  for all  $n \in \mathcal{N}$ . Then,  $\lambda^n \geq 0$  and  $a^n \in A$  for all  $n \in \mathcal{N}$ . In addition,  $\sum_{n \in \mathcal{N}} \lambda^n =$   
881  $\sum_{n \in \mathcal{N}} \prod_{i=1}^I \lambda_i^{n_i} = (\lambda_1^1 + \dots + \lambda_1^{N_1})(\lambda_2^1 + \dots + \lambda_2^{N_2}) \dots (\lambda_I^1 + \dots + \lambda_I^{N_I}) = 1$ . Furthermore, for all  $i \in [I]$ , we have

$$\begin{aligned} \sum_{n \in \mathcal{N}} \lambda^n a_i^{n_i} &= \sum_{m_i=1}^{N_i} \sum_{n \in \mathcal{N} : n_i = m_i} \lambda^n a_i^{n_i} \\ &= \sum_{m_i=1}^{N_i} a_i^{m_i} \sum_{n \in \mathcal{N} : n_i = m_i} \lambda^n \\ &= \sum_{m_i=1}^{N_i} a_i^{m_i} \lambda_i^{m_i} \\ &= a_i, \end{aligned}$$

882 where third equality is because, for fixed  $i \in [I]$  and  $m_i \in [N_i]$ ,  $\sum_{n \in \mathcal{N} : n_i = m_i} \lambda^n = (\lambda_1^1 + \dots + \lambda_1^{N_1}) \dots (\lambda_{m_i-1}^1 +$   
883  $\dots + \lambda_{m_i-1}^{N_{m_i-1}}) \lambda_i^{m_i} (\lambda_{m_i+1}^1 + \dots + \lambda_{m_i+1}^{N_{m_i+1}}) \dots (\lambda_I^1 + \dots + \lambda_I^{N_I}) = \lambda_i^{m_i}$ , and the last inequality follows from the defi-  
884 nitions of  $\{\lambda_i^{n_i}\}_{n_i=1}^{N_i}$  and  $\{a_i^{n_i}\}_{n_i=1}^{N_i}$ . It follows that  $a \equiv [a_1, \dots, a_I]^\top = \sum_{n \in \mathcal{N}} \lambda^n [a_1^{n_1}, \dots, a_I^{n_I}]^\top \equiv \sum_{n \in \mathcal{N}} \lambda^n a^n$

885 and hence  $a \in \text{conv}(A)$ . This completes the proof.  $\square$

886

887 We are now ready to present the main proof of this section.

888 *Proof of Proposition 5:* Since  $\mathcal{H}_D$  is separable in index  $i$ , we have  $\mathcal{H}_D = \prod_{i=1}^I \mathcal{H}_i^D$ , where each  $\mathcal{H}_i^D$  is defined

889 as

$$\mathcal{H}_i^D := \left\{ (t, s_i, r, p_i) : r_j + \sum_{k=1}^j t_{jk} = 1, \forall j \in P_i, \quad p_i + \sum_{k=1}^{J(i)} s_{ik} = 1, \right. \quad (32a)$$

$$\left. \sum_{k=1}^j t_{jk} \leq 1, \forall j \in P_i, \right. \quad (32b)$$

$$\left. \sum_{k=1}^{J(i)} s_{ik} \leq 1, \right. \quad (32c)$$

$$\left. s_{ik} \leq \sum_{j \in P_i: j \geq k} t_{jk}, \forall k \in [J(i)], \right. \quad (32d)$$

$$s_{ik} + t_{j\ell} \leq 1, \forall k \in [J(i)], \forall j \in P_i : j \geq k+1, \forall \ell \in [k+1, J(i)]_{\mathbb{Z}},$$

$$t_{jk} \leq \sum_{\ell=1}^{J(i)} s_{i\ell}, \forall j \in P_i, \forall k \in [j],$$

$$\left. s_{ik} \in \mathbb{B}, \forall k \in [J(i)], \quad t_{jk} \in \mathbb{B}, \forall j \in P_i, \forall k \in [j] \right\}.$$

890 Following a similar proof in Section 4.1, we can show that incorporating inequalities (10) produces the convex

891 hull of  $\mathcal{H}_i^D$ , i.e.,

$$\begin{aligned} \bar{\mathcal{H}}_i^D := & \left\{ (t, s_i, r, p_i) : \text{(32a)} - \text{(32d)}, \right. \\ & \sum_{\ell=k}^j t_{j\ell} \leq \sum_{\ell=k}^{J(i)} s_{i\ell}, \forall j \in P_i, \forall k \in [j], \\ & \left. s_{ik} \in \mathbb{R}_+, \forall k \in [J(i)], \quad t_{jk} \in \mathbb{R}_+, \forall j \in P_i, \forall k \in [j] \right\}. \end{aligned} \quad (33)$$

892 Let  $\bar{\mathcal{H}}_D = \prod_{i=1}^I \bar{\mathcal{H}}_i^D$ . Then, it follows from Lemma 4 that  $\bar{\mathcal{H}}_D = \text{conv}(\mathcal{H}_D)$ . Following a similar proof as that

893 of Theorem 4 we have

$$\begin{aligned} \max_{(\alpha, \beta) \in \Lambda} F(\alpha, \beta) &= \max_{(t, s, r, p) \in \bar{\mathcal{H}}_D} \sum_{j=1}^J \left( c_j^r r_j + \sum_{k=1}^j c_{jk}^t t_{jk} \right) + \sum_{i=1}^I \left( c_i^p p_i + \sum_{k=1}^{J(i)} c_{ik}^s s_{ik} \right) \\ &= \sum_{i=1}^I \left[ \max_{(t, s_i, r, p_i) \in \bar{\mathcal{H}}_i^D} \sum_{j \in P_i} \left( c_j^r r_j + \sum_{k=1}^j c_{jk}^t t_{jk} \right) + \left( c_i^p p_i + \sum_{k=1}^{J(i)} c_{ik}^s s_{ik} \right) \right] \\ &= \sum_{i=1}^I \left[ c_i^p + \sum_{j \in P_i} c_j^r + \max_{s_i \geq 0: \text{(32c)}} \sum_{k=1}^{J(i)} (c_{ik}^s - c_i^p) s_{ik} + \left( \max_{t \geq 0} \sum_{j \in P_i} \sum_{k=1}^j (c_{jk}^t - c_j^r) t_{jk} \right) \right] \quad (34) \\ & \quad \text{s.t. (32b), (32d), (33)}. \end{aligned}$$

894 For every  $i \in [I]$ , an optimal solution  $(s_i^*, t^*)$  to (34) is integral as  $\bar{\mathcal{H}}_i^D = \text{conv}(\mathcal{H}_i^D)$  is an integral polyhedron.

895 Following a similar proof in Theorem 4, we have

$$\max_{(\alpha, \beta) \in \Lambda} F(\alpha, \beta) = \sum_{i=1}^I \left[ \max \left\{ c_i^p + \sum_{j \in P_i} c_j^r, \right. \right.$$

$$\max_{j^* \in P_i, k^* \in [j^*]} \left\{ \sum_{j \in P_i} c_j^r + c_{ik^*}^s + (c_{j^*k^*}^t - c_{j^*}^r) + \sum_{j \in P_i \setminus \{j^*\}} \left( \max_{k \in [\min\{j, k^*\}]} \{c_{jk}^t - c_j^r\} \right) \right\}.$$

896 We define  $\chi_{jk^*} := \max_{k \in [\min\{j, k^*\}]} \{c_{jk}^t - c_j^r\}$  for all  $j \in [J]$  and  $k^* \in [J]$ . Then, we rewrite (34) as follows:

$$\begin{aligned} & \min \sum_{i=1}^I \theta_i \\ & \text{s.t. } \theta_i \geq c_i^p + \sum_{j \in P_i} c_j^r, \quad \forall i \in [I], \\ & \theta_i \geq \sum_{j \in P_i} c_j^r + c_{ik^*}^s + (c_{j^*k^*}^t - c_{j^*}^r) + \sum_{j \in P_i \setminus \{j^*\}} \chi_{jk^*}, \quad \forall i \in [I], \forall j^* \in P_i, \forall k^* \in [j^*], \\ & \chi_{jk^*} \geq (c_{jk}^t - c_j^r), \quad \forall j \in [J], \forall k^* \in [J], \forall k \in [\min\{j, k^*\}]. \end{aligned}$$

897 Moreover, we define the following auxiliary variables:

$$\left. \begin{aligned} \zeta_j^e &:= \left[ -\gamma_j w_j^L - \sum_{\ell=1}^{w_j^U - w_j^L} \varphi_{j\ell} \right]_+ \\ \eta_j^e &:= \max_{\tilde{d}_j \in [d_j^L, d_j^U]_{\mathbb{Z}}} \left\{ -\sum_{q=1}^Q \tilde{d}_j^q \rho_{jq} \right\} \end{aligned} \right\} \quad \forall j \in [J], \quad (35a)$$

$$\left. \begin{aligned} \zeta_{jk}^x &:= \left[ (-c_k^x - \gamma_j) w_j^L - \sum_{\ell=1}^{w_j^U - w_j^L} (c_k^x u_{j\ell} + \varphi_{j\ell}) \right]_+ \\ \eta_{jk}^x &:= \max_{\tilde{d}_j \in [d_j^L, d_j^U]_{\mathbb{Z}}} \left\{ c_k^x \tilde{d}_j - \sum_{q=1}^Q \tilde{d}_j^q \rho_{jq} \right\} \end{aligned} \right\} \quad \forall j \in [J], \forall k \in [j], \quad (35b)$$

$$\phi_i^e := \left[ -\lambda_i y_i^L - \sum_{\ell=1}^{y_i^U - y_i^L} \nu_{i\ell} \right]_+, \quad \forall i \in [I], \quad (35c)$$

$$\phi_{ik}^x := \left[ (-c_k^x - \lambda_i) y_i^L - \sum_{\ell=1}^{y_i^U - y_i^L} (c_k^x v_{i\ell} + \nu_{i\ell}) \right]_+, \quad \forall i \in [I], \forall k \in [J(i)], \quad (35d)$$

898 Since  $c_j^r = \zeta_j^e + \eta_j^e$ ,  $c_{jk}^t = \zeta_{jk}^x + \eta_{jk}^x$ ,  $c_i^p = \phi_i^e$ , and  $c_{ik}^s = \phi_{ik}^x$ , we can rewrite (34) as follows:

$$\begin{aligned} & \min \sum_{i=1}^I \theta_i \\ & \text{s.t. } (35), \\ & \theta_i \geq \phi_i^e + \sum_{j \in P_i} (\zeta_j^e + \eta_j^e), \quad \forall i \in [I], \\ & \theta_i \geq \sum_{j \in P_i} (\zeta_j^e + \eta_j^e) + \phi_{ik^*}^x + (\zeta_{j^*k^*}^x + \eta_{j^*k^*}^x) - (\zeta_{j^*}^e + \eta_{j^*}^e) + \sum_{j \in P_i \setminus \{j^*\}} \chi_{jk^*}, \quad \forall i \in [I], \forall j^* \in P_i, \forall k^* \in [j^*], \\ & \chi_{jk^*} \geq (\zeta_{jk}^x + \eta_{jk}^x) - (\zeta_j^e + \eta_j^e), \quad \forall j \in [J], \forall k^* \in [J], \forall k \in [\min\{j, k^*\}]. \end{aligned}$$

899 This completes the proof. □

900

## 901 Appendix N: Proof of Theorem 5

902 *Proof:* Each trajectory of states  $t_{[1]}, (t_{[1]}, t_{[2]}), \dots, (t_{[1]}, t_{[I]})$  in the DP corresponds to an S-T path in the net-  
 903 work  $(\mathcal{N}, \mathcal{A})$ , where the objective function value of the trajectory  $V_I(t_{[1]}, t_{[I]}) + \sum_{k \leq 1 \vee I} (c_{Ik}^s - c_I^p) h_k(t_{[I]}, t_{[1]})$   
 904 equals the length of the S-T path by definition of the arc lengths  $c_{[m,n]}$ . Likewise, each S-T path in  $(\mathcal{N}, \mathcal{A})$   
 905 corresponds to a trajectory of states in the DP and the length of the path equals the objective function  
 906 value of the trajectory. This proves that the length of the longest path in  $(\mathcal{N}, \mathcal{A})$  equals  $\max_{(\alpha, \beta) \in \Lambda} F(\alpha, \beta)$   
 907 and completes the proof. □

908

909 **Appendix O: Proof of Proposition 6**

910 *Proof:* Taking the dual of the longest-path formulation yields

$$\begin{aligned}
 \min_{\pi} \quad & \pi_S - \pi_T + \sum_{i=1}^I (c_i^r + c_i^p) \\
 \text{s.t.} \quad & \pi_S - \pi_{t_{[1]}} \geq (c_{11}^t - c_1^r)t_{11}, \quad \forall t_{[1]} \in \mathcal{B}_1, \\
 & \pi_{t_{[1]}} - \pi_{(t_{[1]}, e_{2\ell})} \geq \begin{cases} (c_{11}^s - c_1^p)t_{11} & \text{if } \ell = 0 \\ (c_{2\ell}^t - c_2^r) + (c_{1\ell}^s - c_1^p) & \text{if } \ell \neq 0 \end{cases} \quad \forall t_{[1]} \in \mathcal{B}_1, \forall \ell \preceq 2, \\
 & \pi_{(t_{[1]}, e_{(i-1)k})} - \pi_{(t_{[1]}, e_{i\ell})} \geq \begin{cases} 0, & \text{if } k = 0, \ell = 0 \\ c_{(i-1)k}^s - c_{i-1}^p, & \text{if } k \neq 0, \ell = 0 \\ (c_{i\ell}^t - c_i^r) + (c_{(i-1)(k\vee\ell)}^s - c_{i-1}^p), & \text{if } \ell \neq 0, \end{cases} \\
 & \quad \quad \quad \forall t_{[1]} \in \mathcal{B}_1, \forall i \in [3, I]_{\mathbb{Z}}, \forall k \preceq i-1, \forall \ell \preceq i, \\
 & \pi_{(t_{[1]}, e_{Ik})} - \pi_T \geq \begin{cases} (c_{I1}^s - c_I^p)t_{11} & \text{if } k = 0 \\ c_{Ik}^s - c_I^p & \text{if } k \neq 0 \end{cases} \quad \forall t_{[1]} \in \mathcal{B}_1, \forall k \preceq I,
 \end{aligned}$$

911 where dual variables  $\pi$  are associated with the (primal) flow balance constraints and all dual constraints are  
 912 associated with the primal variables  $x$ . The strong duality holds valid because the longest-path formulation  
 913 is finitely optimal. The claimed reformulation of (DRNS) then follows from a similar proof as that of  
 914 Proposition 4. □

915

916 **Appendix P: Formulation for DRO<sup>exo</sup>**

917 We formulate DRO<sup>exo</sup>, which models constant nurse show-up rates (exogenous of the staffing levels) as  
 918 follows:

$$\begin{aligned}
 (\text{DRO}^{\text{exo}}): \quad & \min_{w, y} \sum_{j=1}^J c_j^w w_j + \sum_{i=1}^I c_i^y y_i + \max_{\mathbb{Q} \in \mathcal{D}^{\text{exo}}} \mathbb{E}_{\mathbb{Q}} \left[ V(\tilde{u} \circ w, \tilde{p} \circ y, \tilde{d}) \right] \\
 \text{s.t.} \quad & \text{(3b)–(3c)},
 \end{aligned}$$

919 where  $\tilde{u} \in [0, 1]^J$  and  $\tilde{p} \in [0, 1]^I$  are the show-up rates of unit and pool nurses, respectively,  $\circ$  represents the  
 920 element-wise product, and  $\mathbb{Q}$  is the probability distribution of  $(\tilde{u}, \tilde{p}, \tilde{d})$ . We formulate the ambiguity set  $\mathcal{D}^{\text{exo}}$   
 921 for  $\mathbb{Q}$  as

$$\begin{aligned}
 \mathcal{D}^{\text{exo}} = \quad & \left\{ \mathbb{Q} \in \mathcal{P}(\Gamma) : \mathbb{E}_{\mathbb{Q}}[\tilde{d}_j^q] = \mu_{jq}, \quad \forall j \in [J], \forall q \in [Q], \right. \\
 & \left. \mathbb{E}_{\mathbb{Q}}[\tilde{u}_j] = \tau_j^w, \quad \forall j \in [J], \quad \mathbb{E}_{\mathbb{Q}}[\tilde{p}_i] = \tau_i^y, \quad \forall i \in [I] \right\},
 \end{aligned}$$

922 where  $\Gamma := [0, 1]^J \times [0, 1]^I \times \Xi_{\tilde{d}}$  represents the support of  $(\tilde{u}, \tilde{p}, \tilde{d})$  and  $(\tau^w, \tau^y)$  are the mean show-up rates.  
 923 We note that, unlike  $\mathcal{D}(w, y)$  in DRNS,  $\mathcal{D}^{\text{exo}}$  is independent of the staffing levels.

924 DRO<sup>exo</sup> can be viewed as a special case of DRNS, wherein we set  $f_j(w_j) = \tau_j^w w_j$  for all  $j \in [J]$  and  
 925  $g_i(y_i) = \tau_i^y y_i$  for all  $i \in [I]$ . As a result, we can solve DRO<sup>exo</sup> using the same solution approaches (e.g.,  
 926 Algorithm 1) as DRNS.

927 **Appendix Q: Derivation for (17)**

928 Using the standard duality techniques as in the proof of Proposition 1, we recast the DRNS<sup>(Q)</sup> model as the  
 929 following min-max reformulation:

$$\min_{(w,y) \in \mathcal{W}, \gamma, \lambda, \rho} \max_{(\alpha, \beta) \in \Lambda} \underline{F}(\alpha, \beta) + \sum_{i=1}^I \left( c_i^x y_i + \sum_{q=1}^Q g_{iq}(y_i) \lambda_{iq} \right) + \sum_{j=1}^J \left[ c_j^w w_j + \sum_{q=1}^Q \mu_{jq} \rho_{jq} + \sum_{q=1}^Q f_{jq}(w_j) \gamma_{jq} \right],$$

930 where  $\mathcal{W} := \{(w, y) : (3b) - (3c)\}$  and

$$\begin{aligned} \underline{F}(\alpha, \beta) := & \sum_{j=1}^J \left[ \max_{\tilde{w}_j \in [0, w_j]_{\mathbb{Z}}} \left\{ -\alpha_j \tilde{w}_j - \sum_{q=1}^Q \gamma_{jq} \tilde{w}_j^q \right\} + \max_{\tilde{d}_j \in [d_j^L, d_j^U]_{\mathbb{Z}}} \left\{ \alpha_j \tilde{d}_j - \sum_{q=1}^Q \rho_{jq} \tilde{d}_j^q \right\} \right] + \\ & \sum_{i=1}^I \max_{\tilde{y}_i \in [0, y_i]_{\mathbb{Z}}} \left\{ \beta_i \tilde{y}_i - \sum_{q=1}^Q \lambda_{iq} \tilde{y}_i^q \right\}. \end{aligned}$$

931 The computation of  $\underline{F}(\alpha, \beta)$  involves a set of integer programs with polynomial objective functions and  
 932 changing feasible regions pertaining to the staffing levels  $(w, y)$ , yielding an intractable formulation.

933 Fortunately, we can relax the decision-dependent support sets  $[0, w_j]_{\mathbb{Z}}$  and  $[0, y_i]_{\mathbb{Z}}$  to be decision-  
 934 independent  $[0, w_j^U]_{\mathbb{Z}}$  and  $[0, y_i^U]_{\mathbb{Z}}$ , respectively, by replacing  $(w, y)$  with their upper bounds  $(w^U, y^U)$ . This  
 935 produces an upper bound for  $\underline{F}(\alpha, \beta)$ . In addition, the integer programs in  $\underline{F}(\alpha, \beta)$  can now be solved by  
 936 enumerating a linear number of staffing levels, i.e.,  $\tilde{w}_j \in [0, w_j^U]_{\mathbb{Z}}$  and  $\tilde{y}_i \in [0, y_i^U]_{\mathbb{Z}}$ . This bounds  $\underline{F}(\alpha, \beta)$  as

$$\begin{aligned} \underline{F}(\alpha, \beta) & \leq F(\alpha, \beta) \\ & := \sum_{j=1}^J \left[ \max_{\tilde{w}_j \in [0, w_j^U]_{\mathbb{Z}}} \left\{ -\alpha_j \tilde{w}_j - \sum_{q=1}^Q \gamma_{jq} \tilde{w}_j^q \right\} + \max_{\tilde{d}_j \in [d_j^L, d_j^U]_{\mathbb{Z}}} \left\{ \alpha_j \tilde{d}_j - \sum_{q=1}^Q \rho_{jq} \tilde{d}_j^q \right\} \right] + \\ & \quad \sum_{i=1}^I \max_{\tilde{y}_i \in [0, y_i^U]_{\mathbb{Z}}} \left\{ \beta_i \tilde{y}_i - \sum_{q=1}^Q \lambda_{iq} \tilde{y}_i^q \right\} \\ & = \sum_{j=1}^J \left[ \mathbb{1}_{\{0\}}(\alpha_j) \left\{ \max_{\tilde{w}_j \in [0, w_j^U]_{\mathbb{Z}}} \left\{ -\sum_{q=1}^Q \gamma_{jq} \tilde{w}_j^q \right\} + \max_{\tilde{d}_j \in [d_j^L, d_j^U]_{\mathbb{Z}}} \left\{ -\sum_{q=1}^Q \rho_{jq} \tilde{d}_j^q \right\} \right\} \right] + \\ & \quad \sum_{k=1}^j \mathbb{1}_{\{c_k^x\}}(\alpha_j) \left\{ \max_{\tilde{w}_j \in [0, w_j^U]_{\mathbb{Z}}} \left\{ -c_k^x \tilde{w}_j - \sum_{q=1}^Q \gamma_{jq} \tilde{w}_j^q \right\} + \max_{\tilde{d}_j \in [d_j^L, d_j^U]_{\mathbb{Z}}} \left\{ c_k^x \tilde{d}_j - \sum_{q=1}^Q \rho_{jq} \tilde{d}_j^q \right\} \right\} \right] + \\ & \quad \sum_{i=1}^I \left[ \mathbb{1}_{\{0\}}(\max_{j \in P_i} \alpha_j) \left\{ \max_{\tilde{y}_i \in [0, y_i^U]_{\mathbb{Z}}} \left\{ -\sum_{q=1}^Q \lambda_{iq} \tilde{y}_i^q \right\} \right\} \right] + \\ & \quad \sum_{k=1}^{J(i)} \mathbb{1}_{\{c_k^x\}}(\max_{j \in P_i} \alpha_j) \left\{ \max_{\tilde{y}_i \in [0, y_i^U]_{\mathbb{Z}}} \left\{ -c_k^x \tilde{y}_i - \sum_{q=1}^Q \lambda_{iq} \tilde{y}_i^q \right\} \right\} \right] \\ & = \sum_{j=1}^J \left[ \mathbb{1}_{\{0\}}(\alpha_j) c_j^r + \sum_{k=1}^j \mathbb{1}_{\{c_k^x\}}(\alpha_j) c_{jk}^t \right] + \sum_{i=1}^I \left[ \mathbb{1}_{\{0\}}(\max_{j \in P_i} \alpha_j) c_i^p + \sum_{k=1}^{J(i)} \mathbb{1}_{\{c_k^x\}}(\max_{j \in P_i} \alpha_j) c_{ik}^s \right], \end{aligned}$$

937 where the last equality follows from the definition of  $(c_j^r, c_{jk}^t, c_i^p, c_{ik}^s)$  in (17). Finally, we observe that  $F(\alpha, \beta)$   
 938 is jointly convex in  $(\alpha, \beta)$  and hence the problem  $\max_{(\alpha, \beta) \in \Lambda} F(\alpha, \beta)$  resorts to the extreme points of  $\Lambda$ .  
 939 Following Lemma 2, as well as the subsequent construction of binary variables  $(t, s, r, p)$  and set  $\mathcal{H}$ , we have

$$\max_{(\alpha, \beta) \in \Lambda} F(\alpha, \beta) = \max_{(t, s, r, p) \in \mathcal{H}} \sum_{j=1}^J \left( c_j^r r_j + \sum_{k=1}^j c_{jk}^t t_{jk} \right) + \sum_{i=1}^I \left( c_i^p p_i + \sum_{k=1}^{J(i)} c_{ik}^s s_{ik} \right).$$
